1 **Oxytocin reduces subjective fear in naturalistic social contexts via enhancing top-down middle**  
2 **cingulate-amygdala regulation and brain-wide connectivity**

3

4

5 **Authors**

6 Kun Fu<sup>1,2</sup>, Shuyue Xu<sup>3,4</sup>, Zheng Zhang<sup>1,2</sup>, Dan Liu<sup>1,2</sup>, Ting Xu<sup>1,2</sup>, Yuan Zhang<sup>1,2</sup>, Feng Zhou<sup>5,6</sup>,  
7 Xiaodong Zhang<sup>1,2</sup>, Chunmei Lan<sup>1,2</sup>, Junjie Wang<sup>1,2</sup>, Lan Wang<sup>1,2</sup>, Jingxian He<sup>1,2</sup>, Keith M  
8 Kendrick<sup>1,2</sup>, Bharat Biswal<sup>2,7</sup>, Zhen Liang<sup>3,4\*</sup>, Weihua Zhao<sup>1,2\*</sup>, Benjamin Becker<sup>1,2,8,9,10\*</sup>

9

10

11 **Affiliations**

12 <sup>1</sup>The Center of Psychosomatic Medicine, Sichuan Provincial Center for Mental Health, Sichuan  
13 Provincial People's Hospital, University of Electronic Science and Technology of China, Chengdu,  
14 China

15 <sup>2</sup>MOE Key Laboratory for Neuroinformation, School of Life Science and Technology, University of  
16 Electronic Science and Technology of China, Chengdu, China

17 <sup>3</sup>School of Biomedical Engineering, Medical School, Shenzhen University, Shenzhen, China

18 <sup>4</sup>Guangdong Provincial Key Laboratory of Biomedical Measurements and Ultrasound Imaging,  
19 Shenzhen, China

20 <sup>5</sup>Faculty of Psychology, Southwest University, Chongqing, China

21 <sup>6</sup>Key Laboratory of Cognition and Personality, Ministry of Education, Chongqing, China

22 <sup>7</sup>Department of Biomedical Engineering, New Jersey Institute of Technology, Newark, USA

23 <sup>8</sup>State Key Laboratory of Brain and Cognitive Sciences, The University of Hong Kong, Hong Kong,  
24 China

25 <sup>9</sup>Department of Psychology, The University of Hong Kong, Hong Kong, China

26 <sup>10</sup>**Lead contact**

27

28 **\*Corresponding authors**

29 bbecker@hku.hk (B. Becker, lead contact)

30 janezliang@szu.edu.cn (Z. Liang)

31 zarazhao@uestc.edu.cn (W. Zhao)

32

33

34

35

36

37 **Abstract**

38 Accumulating evidence from animal and human studies suggests a fear-regulating potential of  
39 the neuropeptide oxytocin (OT), yet the clinical translation into novel interventions for  
40 pathological fear requires a behavioral and neurofunctional characterization under close-to-real  
41 life conditions. Here, we combined a naturalistic fMRI-design inducing high and immersive fear  
42 experience in social and non-social contexts with a preregistered between-subjects randomized  
43 double-blind placebo-controlled intranasal OT trial (24 IU, n = 67 healthy men). OT reduced  
44 subjective fear in non-social and social contexts with small or moderate effect sizes, respectively.  
45 In the social fear contexts, OT enhanced left middle cingulate cortex (IMCC) activation and its  
46 functional connectivity with the contralateral amygdala, with both neural indices significantly and  
47 inversely associated with subjective fear following OT. On the network level, OT enhanced  
48 communication between the dorsal attention network (DAN) with the fronto-parietal (FPN) and  
49 the default-mode network (DMN) as well as on the more fine-grained level brain-wide  
50 communication. These findings indicate a fear-reducing potential of OT under naturalistic  
51 conditions with pronounced effects in social contexts, suggesting a high treatment value in  
52 disorders with social context-related excessive fear.

53

54

## 55 Introduction

56 Fear is an evolutionarily conserved and highly adaptive defensive avoidance response,  
57 fundamental to surviving and functioning in everyday life<sup>1-4</sup>. The experience of excessive and  
58 overwhelming fear represents a hallmark symptom of anxiety and trauma-related disorders<sup>5-7</sup>.  
59 These highly prevalent psychiatric disorders have become a leading cause of disability and are  
60 accompanied by personal suffering as well as an enormous socio-economic burden. The  
61 conventional pharmacological interventions targeting the classical neurotransmitter (GABA-ergic,  
62 serotonergic) systems<sup>7-9</sup> are characterized by moderate response rates and potential negative  
63 side effects ranging from dizziness towards addiction. While several promising candidate  
64 compounds have shown effects in animal models, no new pharmacological treatment for fear or  
65 anxiety has entered the clinical practice during the last decades (for recent non-pharmacological  
66 developments see e.g.<sup>10, 11</sup>).

67 Based on promising findings in animal models and preclinical human studies neuropeptides,  
68 including oxytocin (OT), vasopressin or angiotensin II, have been suggested as promising new  
69 strategies to regulate fear and anxiety<sup>12-16</sup>. Most previous research in this field has focused on  
70 OT, a neuropeptide produced in the hypothalamus, and animal models<sup>15, 16</sup> as well as preclinical  
71 human proof-of-concept studies demonstrated promising effects of OT on regulating negative  
72 emotional processing in the domains of fear and anxiety<sup>16-20</sup>. Some of the effects of OT appear to  
73 be specific to social contexts and stimuli, yet in the context of contradictory empirical evidence,  
74 debates on the social-specific effects of OT continue<sup>21, 22</sup>.

75 OT neurons from the hypothalamus project to a wide range of brain regions involved in fear,  
76 anxiety as well as social processes, including the amygdala, hippocampus, midbrain and frontal  
77 lobe<sup>5, 23</sup>, and previous studies indicate that intranasal OT can regulate these processes via  
78 influencing activity in the amygdala, dorsal anterior cingulate gyrus and medial prefrontal lobe<sup>7,  
79 18-20, 24-26</sup>. However, despite the initially promising findings from these studies, the fear and  
80 anxiety-reducing effects of OT and the underlying neural circuits have been determined under  
81 laboratory experimental contexts that strongly differ from the dynamic contexts during which  
82 fear arises in everyday life<sup>27</sup>. Specifically, these studies combined the intranasal administration of  
83 OT with sparsely presented static experimental stimuli (e.g. pictures of fearful faces or scenes)  
84 and primarily focused on treatment-induced changes in brain regional activity during fMRI.

85 This approach stands in contrast to contemporary neuroscience models proposing that fear  
86 emerges in interaction between subjective appraisal and dynamic changes in the environment<sup>28,  
87 29</sup> and that the corresponding mental states are mediated by an intricate interplay among  
88 distributed yet interacting brain systems<sup>30-32</sup>. To account for the complexity of subjective  
89 affective experiences under ecologically valid conditions and to capture the underlying network-  
90 level communication in the brain, recent overarching conceptualizations have proposed the

91 combination of movie stimuli as highly immersive and dynamic stimuli with network-level  
92 analyses<sup>33,34</sup>. Initial empirical studies confirmed that these stimuli can induce highly immersive  
93 affective experiences in complex social situations<sup>35,36</sup> as well as the essential role that network-  
94 level communication plays in establishing affective and social experiences under naturalistic  
95 contexts<sup>27,34,37,38</sup>.

96 Mental disorders, including fear-related disorders, have been reconceptualized as network-  
97 level disorders that are characterized by dysregulated regional activity as well as network level  
98 connectivity (putatively reflecting communication between brain regions)<sup>32,39,40</sup>. Together with a  
99 growing number of studies underscoring the potential of OT to regulate neurofunctional network-  
100 level interactions in fear-related networks across species<sup>41-44</sup>, which may be partly explained by  
101 the physiological properties of the oxytocin-signaling system, including an axonal release,  
102 widespread receptor distribution and considerably longer half-life compared to classical  
103 neurotransmitters<sup>45</sup>, these findings indicate the necessity to account for network-level effects to  
104 fully determine a regulatory effect of OT on fear experience and its therapeutic potential.

105 Against this background, the present pre-registered between-subjects randomized double-  
106 blind placebo-controlled pharmacofMRI study ( $n = 67$  healthy male participants) capitalized on  
107 recent progress in naturalistic fMRI and network-level analyses to determine whether a single  
108 dosage of intranasal OT (1) reduces the subjective experience of fear under highly immersive and  
109 ecologically valid conditions, (2) modulates concomitant regional activity in brain systems  
110 identified in previous studies, (3) modulates brain communication of the identified regions and  
111 on the whole-brain network level, and (4) effects vary as a function of social context. Based on  
112 previous studies<sup>7,18-20</sup> we hypothesized that intranasal OT would decrease subjective fear in  
113 naturalistic contexts with more pronounced effects in the social domain while concomitantly  
114 enhancing neural activity in regulatory brain regions and inhibiting activity in fear-processing  
115 brain regions. On the network level, we expected that OT would enhance communication  
116 between emotion-regulation brain regions and the amygdala as well as communication between  
117 large-scale networks with pronounced effects in the social fear context.

118

## 119 **Methods**

### 120 **Participants**

121 Sixty-nine right-handed male participants with normal or corrected-normal vision were recruited  
122 from the University of Electronic Science and Technology of China. The sample size was  
123 determined using G\*Power v.3.1<sup>46,47</sup> indicating that 62 participants were required to detect a  
124 significant effect on the behavioral level ( $f = 0.25$ ,  $\alpha = 0.05$ ,  $\beta = 0.80$ ,  $2 \times 2 \times 2$  mixed ANOVA  
125 interaction effect). The present study focused on male subjects to reduce variance related to sex

126 differences in the effects of OT<sup>48,49</sup> and adhered to validated exclusion criteria (details see  
127 supplementary methods). The final sample size was  $n = 67$  (mean  $\pm$  SD, age =  $21.03 \pm 1.95$   
128 years) due to two data from two participants being excluded (withdraw due to personal reasons,  
129 technical MRI issues). All participants provided written informed consent, protocols were pre-  
130 registered on Clinical Trials.gov (clinicaltrials.gov/ NCT05892939), approved by the ethics  
131 committee at the University of Electronic Science and Technology of China (UESTC-  
132 1061423041725893) and in line with the latest Declaration of Helsinki.

133 Using a double-blind randomized, placebo-controlled, between-subject pharmacological  
134 fMRI design, participants were randomly assigned to receive either a single intranasal dose of  
135 oxytocin (OT, 24IU-Sichuan Defeng Pharmaceutical Co. Ltd, China) or a placebo (PLC, same  
136 ingredients i.e. sodium chloride and glycerin but without the peptide). The spray bottles were  
137 identical and dispensed by an independent researcher based on a computer-generated  
138 randomization sequence to ensure double-blinding. The investigators involved in data acquisition  
139 and analyses were blinded for group allocation. Following recent recommendations<sup>50-52</sup>, the fMRI  
140 assessment began 45 minutes after treatment administration.

141 To control for pre-treatment between-group differences, participants completed a series of  
142 mood and mental health questionnaires (as detailed in **Table 1**). Participants were asked to guess  
143 which treatment they had received after the experiment (with a non-significant treatment guess  
144  $\chi^2 = 0.39$ ,  $p = 0.53$ , confirming successful double-blinding). Additionally, participants were  
145 required to complete a surprise recognition task after the experiment that involved presenting  
146 stills of the video clips shown during fMRI and new clips to test the attentive processing of the  
147 stimuli. All participants achieved a re-recognition accuracy of over 75% and no significant  
148 difference in performance was observed between the two treatment groups ( $t_{(1,65)} = -0.693$ ,  $p =$   
149  $0.491$ ).

#### 150 **Naturalistic fear induction paradigm.**

151 The task began 45 minutes after the treatment intervention (see **Fig. 1a**). During the naturalistic  
152 fear induction paradigm, participants were instructed to watch a series of video clips attentively  
153 and rate their level of fear experience after each clip. The clips lasted 25 seconds and were  
154 followed by a 1-3 second jittered fixation cross to separate the stimuli from the rating period.  
155 During the 5-second period following each stimulus, participants were asked to report their level  
156 of subjective fear on a 9-point Likert scale, with 1 indicating no fear and 9 indicating very strong  
157 fear. This was followed by a jittered inter-trial interval of 9-11 seconds, during which a fixation  
158 cross was presented (see **Fig. 1b**). A total of 32 short video clips were presented over 2 runs, with  
159 each run consisting of 16 randomly presented clips, half of which were neutral and half of which  
160 were fear-inducing clips.

161 Given ongoing discussions about the social-specific effects of OT<sup>53,54</sup>, we carefully pre-  
 162 selected a balanced set of stimuli that included social as well as non-social fearful or neutral  
 163 stimuli, respectively. This led to a set of four stimulus categories (fear social clips-FS, fear non-  
 164 social clips-FNS, neutral social clips-NS, neutral non-social clips-NNS, see **Fig. 1c**). For detailed  
 165 characterization of the video clips, see Supplementary Methods. The video clips used for the  
 166 naturalistic fear induction paradigm were selected from a larger database based on stimuli  
 167 evaluation ratings in an independent sample (n = 20; 10 females; age = 22.65 ± 2.01). Key  
 168 exclusion criteria for the video clips were reported in supplementary methods. Based on the  
 169 results of the behavioral ratings (see **Fig. S2**), 8 complimentary video clips were selected for each  
 170 of the four categories. The task was programmed in Python 3.7 using the PsychoPy package  
 171 (version 2022.2.4).

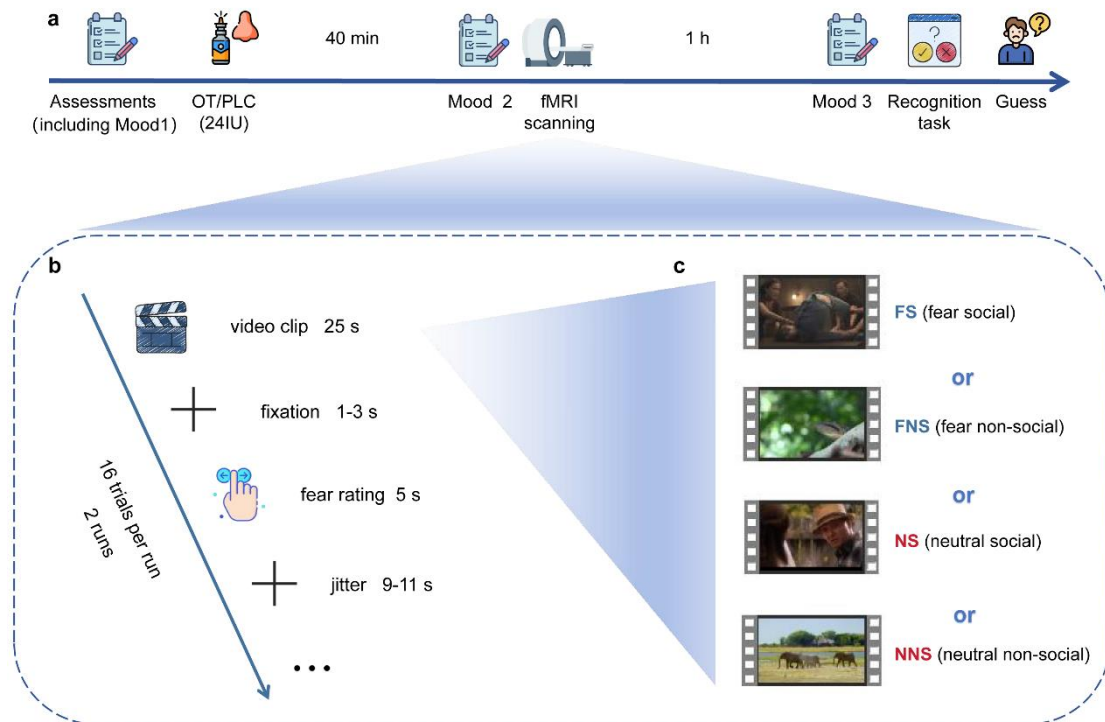

**Fig. 1 Experimental timeline, paradigm and schematic depiction of stimuli.** **a** The timeline of the whole experiment. **b** Naturalistic fear induction and rating paradigm. **c** Example stimuli. In each run, 4 types of video clips were presented (FS, FNS, NS, NNS) according to a randomized order. Abbreviations: OT oxytocin, PLC placebo, fMRI functional magnetic resonance imaging, FS fear social, FNS fear non-social, NS neutral social, NNS neutral non-social. License: Images in 1a and 1b were obtained from Flaticon.com under the free license with attribution.

172 **Effects of OT on subjective fear experience.**

173 To determine the effects of OT on subjective fear in naturalistic contexts and whether they vary  
 174 as a function of social context, we computed a repeated measures ANOVA with the between-  
 175 subject factor treatment (OT vs PLC) and the within-subject factors emotion (fear vs neutral) and  
 176 social (social vs non-social) and the dependent variable fear ratings during fMRI. To initially  
 177 ensure that the selected video clips were effective in inducing the intended emotions, repeated

178 measures ANOVA (sex was used as the independent variable, while emotion and social were used  
179 as repeated variables) were conducted on five rating metrics (see supplementary methods).  
180 Analyses were conducted using GraphPad Prism 9.0 (GraphPad Software, Inc., La Jolla, CA), and  
181 corresponding effect sizes were computed using JASP 0.18.3.0 (JASP Team, 2019; jasp-stats.org).  
182 All ANOVAs and t-tests used false discovery rate (FDR)<sup>55</sup> recommended by Prism for multiple  
183 comparison correction.

#### 184 **MRI data acquisition and preprocessing.**

185 MRI data were collected on a 3.0-T GE Discovery MR750 system (General Electric Medical System,  
186 Milwaukee, WI, USA) and preprocessed using FMRIPREP 21.0.0<sup>56</sup> (RRID: SCR\_016216), a Nipype  
187 1.6.1 based tool that integrates preprocessing routines from different software packages and  
188 SPM 12 (Statistical Parametric Mapping; <http://www.fil.ion.ucl.ac.uk/spm/>; Wellcome Trust  
189 Centre for Neuroimaging, detailed in supplementary methods).

190 Next, a voxel-wise general linear model (GLM) was conducted for each participant.  
191 Specifically, a first-level model was designed that included separate regressors for the four  
192 conditions and the rating period. In line with a previous study<sup>28</sup>, we removed variance associated  
193 with the mean, linear and quadratic trends, the average signal within anatomically-derived CSF  
194 mask, the effects of motion estimated during the head-motion correction using an expanded set  
195 of 24 motion parameters (six realignment parameters, their squares, their derivatives, and their  
196 squared derivatives) and motion spikes (FMRIPREP default:  $FD > 0.5\text{mm}$  or standardized  
197  $DVARs > 1.5$ )<sup>57</sup>.

#### 198 **Effects of OT on fear-related brain activity.**

199 To examine the effects of OT on fear-related neural activity in naturalistic contexts, a GLM-based  
200 model was established in SPM 12. The model incorporated five regressors: FS, FNS, NS, NNS, and  
201 the rating period. We included the 24 head motion parameters as covariates of no interest. Key  
202 first-level contrasts of interest were contrasts that modeled fear in social and non-social contexts  
203 separately (i.e., [FS – NS] or [FNS – NNS]) as well as their interaction (i.e., [FS – NS]  
204 – [FNS – NNS]). In line with the behavioral analyses, the effects of OT were determined using an  
205 ANOVA with the factors emotion and social context, implemented in a partitioned error ANOVA  
206 approach that subjected the first level interaction contrast to a voxel-wise two-sample t-test with  
207 the factor treatment group on the second level. Based on our hypothesis and previous studies  
208 reporting that fear is strongly associated with amygdala, cingulate cortex (particularly middle  
209 cingulate cortex, MCC), insula, and ventromedial prefrontal cortex (vmPFC) and that oxytocin  
210 mediates its anxiolytic effects via these regions<sup>14, 22, 27, 58-60</sup>, our analyses focused on atlas-derived  
211 bilateral masks for the amygdala, MCC, insula and vmPFC using separate small volume correction  
212 (SVC) and family-wise error (FWE) correction<sup>61</sup> applied at peak level.

213 To further disentangle complex interaction effects involving treatment, parameter estimates  
214 were extracted using 8mm radius spheres centered at the peak interaction coordinates using  
215 Marsbar (<http://marsbar.sourceforge.net/>). The extracted Blood Oxygenation Level Dependent  
216 (BOLD) signals were then subjected to appropriate post-hoc tests comparing group differences in  
217 each of the separate conditions.

218 Additionally, to determine associations between the behavioral (subjective fear) and neural  
219 effects of OT (both activation and functional connectivity between specific brain regions) we  
220 conducted correlation analysis using JASP.

### 221 **Effects of OT on functional communication of the regions identified.**

222 We further examined whether the regions showing altered regional activation following OT also  
223 changed their network-level communication via a general Psychophysiological interaction (gPPI)  
224 analysis. gPPI examines functional connectivity between brain regions that is contingent on a  
225 psychological context. We used the Generalized PPI toolbox<sup>62</sup> as implemented in SPM 12, to  
226 conduct gPPI. This method includes additional task regressors to reduce the likelihood that the  
227 functional connectivity estimates are driven simply by co-activation and has been widely used in  
228 similar studies<sup>63, 64</sup>. Based on our results, OT enhanced activation in the left middle cingulate  
229 cortex (IMCC) under the three-way interaction (treatment  $\times$  emotion  $\times$  social), we therefore  
230 computed the functional communication of this region (using an 8mm radius which centered in  
231 peak Montreal Neurological Institute (MNI),  $x, y, z = -7, -3, 30$ ) with other voxels in the whole  
232 brain under the two-way interaction of emotion and social, and a two-sample t-test was  
233 conducted to confirm the treatment effect of OT. Based on previous studies reporting effects of  
234 OT on the functional communication of the amygdala<sup>48, 49</sup>, separate atlas-derived bilateral masks  
235 for the amygdala, MCC, insula and vmPFC were used for SVC analyses with FWE correction<sup>61</sup>  
236 applied at peak level.

237 Marsbar was used to extract information communications between other regions and the  
238 seed region to further disentangle complex interaction effects involving treatment. The extracted  
239 functional connectivity signals were then subjected to compare the treatment effect under four  
240 conditions by using two-sample t-tests separately.

### 241 **Effects of OT on large-scale brain network functional connectivity.**

242 Given that several studies reported the effects of OT on large-scale network organization of the  
243 brain<sup>65, 66</sup>, we examined OT effects on the whole-brain network level. To this end, time-series of  
244 each region of interest (ROI) was extracted according to the template including 463 ROIs across  
245 the whole brain (see supplementary methods), resulting in BOLD time series of the size of  $r \times t$  ( $r$   
246 was the number of ROIs and  $t$  was the BOLD time series length) for each subject per run. A matrix  
247 of size  $r \times r$  was obtained by calculating Pearson's correlation between the average BOLD time  
248 series of each pair of ROIs. Additionally, Fisher's z-transform was applied to improve the



249 normality of the correlation coefficients. The brain regions can be divided into nine networks  
250 based on their functional divisions, and the neural activities of each network's regions were  
251 averaged to calculate network functional connectivity.

252 During each run, four types of video clips were presented in a pseudo-randomized order. The  
253 onset time of each video clip was shifted by 3 TRs to account for hemodynamic lag. To extract  
254 neural activity time series for a specific condition, we used the time points and durations  
255 specified for the appearance of different trials of the same type. This resulted in four  $r \times d$   
256 matrices (where  $r$  is the number of ROIs and  $d$  is the BOLD time series length of each condition).  
257 Additionally, we obtained the  $r \times r$  matrix between ROIs and the  $n \times n$  matrix (where  $n$  is the  
258 number of networks) between brain networks for different conditions.

259 After performing Fisher-Z transformation on the network functional connectivity matrices  
260 for different conditions, matrices of Z-values corresponding to specific conditions  
261 ( $Z_{FS}$ ,  $Z_{FNS}$ ,  $Z_{NS}$ ,  $Z_{FNS}$ ) are obtained. It is important to note that r values are not additive or  
262 subtractive, but Z scores are summative. Matrix of Z-values corresponding to particular contrasts  
263 (e.g.  $Z_{FS-NS}$ ) can be computed by subtract the matrices of Z-values corresponding to different  
264 conditions (e.g.  $Z_{FS}-Z_{NS}$ )<sup>67, 68</sup>. Therefore, each participant in both groups would have their own  
265 subtracted Z-values matrix under specific contrasts ( $Z_{FS-NS}$ ,  $Z_{FNS-NNS}$ ). We then conducted two-  
266 sample t-tests on each pair of network-level functional connectivity to determine the treatment  
267 effect.

### 268 **Effects of OT on whole-brain functional connectivity.**

269 To further investigate the impact of OT on a finer spatial scale, we analyzed whole-brain  
270 functional connectivity using paired t-tests for key contrasts (FS – NNS and FNS – NNS)  
271 separately for the two groups. We applied FDR correction ( $p_{FDR-corrected} < 0.05$ ) to identify the  
272 most relevant functional connections for each contrast. A Mantel test<sup>69, 70</sup> was performed on the  
273 FDR-corrected functional connectivity matrices of the two groups, under specific contrasts, to  
274 assess their similarity. Furthermore, to investigate treatment-specific effects on functional  
275 connectivity strength at the whole-brain level, we transformed the upper triangular data of the t-  
276 value matrices of the two groups under specific contrast into two  $(r \times (r - 1)) / 2$  by 1 feature  
277 vectors, and performed Welch's t-test between them.

278

## 279 **Results**

### 280 **Demographics and potential confounders.**

281 The OT (n = 33) and PLC (n = 34) groups were comparable with respect to socio-demographics,  
282 mood and mental health indices arguing against nonspecific treatment effects (**Table 1**, all  $ps >$   
283 0.10).

**Table 1. Demographics and potential confounders in the two treatment groups.**

|                 | Time                          | OT(M ± SD)    | PLC(M ± SD)   | t     | p    |
|-----------------|-------------------------------|---------------|---------------|-------|------|
| Age             |                               | 21.30 ± 2.05  | 20.76 ± 1.83  | 1.13  | 0.26 |
| BDI II          | Before                        | 4.70 ± 3.83   | 5.38 ± 5.40   | -0.60 | 0.55 |
| BAI             | Before                        | 2.36 ± 2.56   | 2.53 ± 3.75   | -0.21 | 0.83 |
| LSAS            | Before                        | 31.36 ± 20.35 | 26.15 ± 19.47 | 1.07  | 0.29 |
| SAI             | Before                        | 34.79 ± 6.63  | 33.15 ± 9.37  | 0.83  | 0.41 |
| TAI             | Before                        | 37.82 ± 7.30  | 37.97 ± 9.99  | -0.07 | 0.94 |
| ERQ-Reappraisal | Before                        | 31.00 ± 3.98  | 30.74 ± 4.15  | 0.27  | 0.79 |
| ERQ-Suppression | Before                        | 15.85 ± 4.72  | 14.82 ± 4.41  | 0.92  | 0.36 |
| PANAS-P         | Before <sup>1</sup>           | 28.85 ± 6.05  | 28.47 ± 7.17  | 0.23  | 0.82 |
|                 | 2 - 1                         | -6.12 ± 6.71  | -4.06 ± 5.18  | -1.41 | 0.16 |
|                 | Treatment peak <sup>2</sup>   | 22.73 ± 5.95  | 24.41 ± 6.90  | -1.07 | 0.29 |
|                 | 3 - 2                         | -2.85 ± 5.50  | -1.62 ± 5.39  | -0.93 | 0.36 |
|                 | After experiment <sup>3</sup> | 19.88 ± 6.71  | 22.79 ± 7.71  | -1.65 | 0.10 |
| PANAS-N         | 3 - 1                         | -8.97 ± 7.12  | -5.68 ± 7.53  | -1.84 | 0.07 |
|                 | Before <sup>1</sup>           | 15.09 ± 5.17  | 14.09 ± 4.82  | 0.82  | 0.41 |
|                 | 2 - 1                         | -3.24 ± 4.70  | -3.06 ± 4.06  | -0.17 | 0.87 |
|                 | Treatment peak <sup>2</sup>   | 11.85 ± 3.17  | 11.03 ± 2.32  | 1.21  | 0.23 |
|                 | 3 - 2                         | 1.33 ± 2.97   | 1.65 ± 2.62   | -0.46 | 0.65 |
|                 | After experiment <sup>3</sup> | 13.18 ± 4.15  | 12.68 ± 3.86  | 0.52  | 0.61 |
|                 | 3 - 1                         | -1.91 ± 6.07  | -1.41 ± 5.51  | -0.35 | 0.73 |

Values presented here as mean ± standard deviation (M ± SD). *BDI II* Beck Depression Inventory II, *BAI* Beck Anxiety Index, *LSAS* Liebowitz Social Anxiety Scale, *STAI* Spielberger State-Trait Anxiety Inventory, *ERQ* Emotion Regulation Questionnaire, *PANAS* Positive and Negative Affect Schedule, *OT* oxytocin, *PLC* placebo.

284 **OT reduced subjective fear experience in naturalistic contexts, particularly in social**  
 285 **contexts.**

286 The ANOVA revealed a significant main effect of emotion ( $F_{(1,65)} = 1434, p < 0.0001, \eta_p^2 =$   
 287  $0.957, \text{Fig. 2a}$ ) such that participants rated subjective fear considerably higher during fear trials  
 288 (FS and FNS) than neutral ones, and a significant main effect of social ( $F_{(1,65)} = 76.81, p < 0.0001,$   
 289  $\eta_p^2 = 0.542, \text{Fig. 2a}$ ) reflecting lower fear during social trials (FS and NS) compared with non-  
 290 social trials. With respect to the effects of OT we found a significant interaction effect between  
 291 treatment and emotion ( $F_{(3,65)} = 4.064, p = 0.048, \eta_p^2 = 0.059, \text{Fig. 2a}$ ), with post hoc tests  
 292 indicating that OT significantly decreased fear experience in response to fearful stimuli in  
 293 naturalistic social contexts while the effects sizes indicated a stronger fear reduction in social  
 294 contexts ( $t_{(1,65)} = -3.038, p = 0.0027, \text{Cohen's } d = -0.742$  under FS while  $t_{(1,65)} = -1.991, p =$   
 295  $0.048, \text{Cohen's } d = -0.487$  under FNS, **Fig. 2b**). Finally, the interaction between emotion and  
 296 social was significant ( $F_{(3,65)} = 53.15, p < 0.0001, \eta_p^2 = 0.45, \text{Fig. 2a}$ ) reflecting that  
 297 participants reported generally lower fear experience in social fear contexts. The main effect of  
 298 treatment and other interactions were not significant. Together the results partly support that OT

299 can reduce subjective fear in naturalistic situations and that the effects are more pronounced in  
 300 social fear contexts.

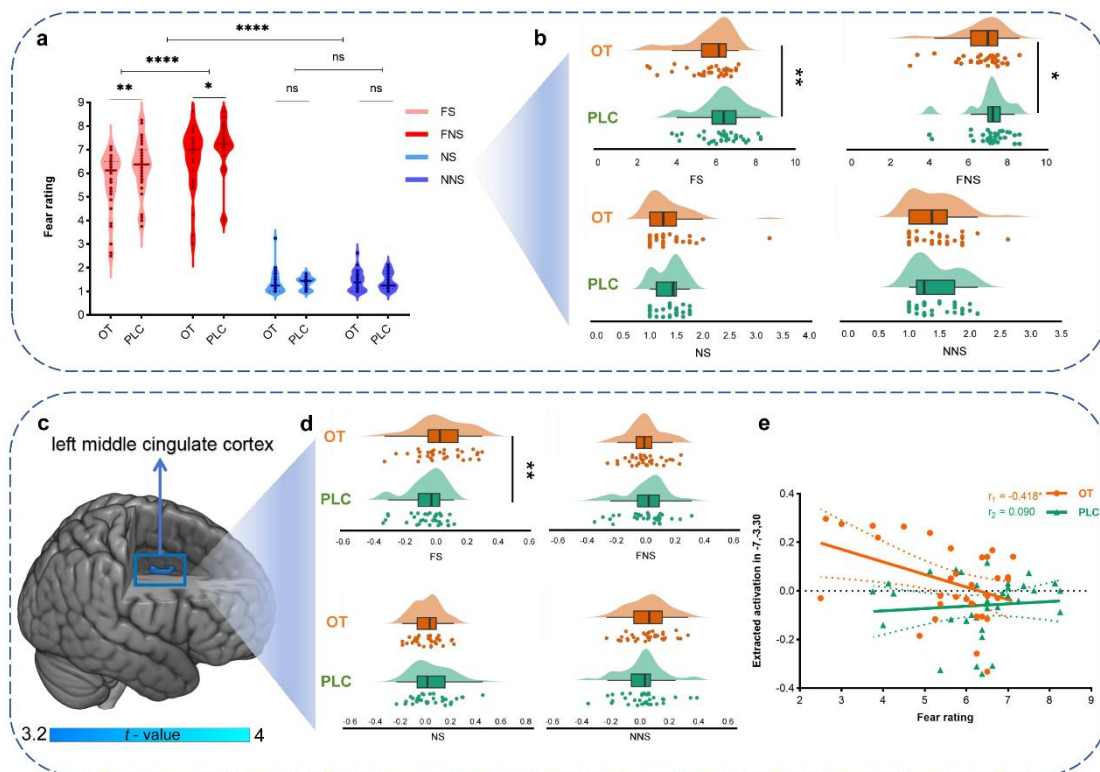

**Fig. 2 The effects of OT on behavioral fear rating and cingulate activity.** **a** OT reduced subjective fear rating in naturalistic situations particularly in contexts, **b** OT effects on fear rating under four conditions separately, **c** OT but not PLC could strengthen the activation in the left middle cingulate cortex (IMCC) under the interaction of valence and social. Particularly, **d** OT specifically increased the activation in IMCC under FS but not other conditions. **e** The activation in IMCC was significantly negatively correlated with subjective fear experience in OT group but not PLC group. OT oxytocin, PLC placebo, FS fear social, FNS fear non-social, NS neutral social, NNS neutral non-social. \*\*\*\*  $p_{\text{FDR-corrected}} < 0.0001$ , \*\*\*  $p_{\text{FDR-corrected}} < 0.001$ , \*\*  $p_{\text{FDR-corrected}} < 0.01$ , \*  $p_{\text{FDR-corrected}} < 0.05$ , ns not significant.

301 **OT enhanced middle cingulate activation in the social fear contexts.**

302 We initially examined brain regions participating in fear processing under naturalistic contexts  
 303 with different social features compared with neutral control conditions, a series of corresponding  
 304 voxel-wise one-sample t-tests conducted in the PLC group confirmed previous studies, suggesting  
 305 that visual and temporal regions were strongly engaged during exposure to dynamic fear movie  
 306 clips irrespective of social features (**Fig. S3**). Examining treatment effects revealed a significant  
 307 interaction between treatment  $\times$  emotion  $\times$  social located in the left middle cingulate cortex  
 308 (peak MNI, x, y, z = -7, -3, 30,  $t_{(1,65)} = 3.67$ , k = 33,  $p_{\text{FWE-peak(svc)}} = 0.019$ , **Fig. 2c**), with post-hoc t-  
 309 tests on extracted activity measures from this region indicating that compared to PLC, OT  
 310 selectively enhanced activation in this region for FS ( $t_{(1,65)} = 2.761$ ,  $p = 0.007$ , Cohen's  $d = 0.675$ ,  
 311 **Fig. 2d**) but not other conditions (all  $p_s > 0.05$ , **Fig. 2d**). Examining associations between IMCC  
 312 activation (extracted parameter estimates) and subjective fear experience revealed a significant  
 313 negative association in the OT ( $r = -0.418$ ,  $p = 0.016$ , **Fig. 2e**) but not in PLC group ( $r = 0.090$ ,  $p =$

314 0.611, **Fig. 2e**). A Fisher  $r$ - $z$  transformation indicated that these correlation coefficients were  
 315 significantly different between the OT and PLC groups ( $Z = -2.09$ , two-tailed  $p = 0.037$ ).  
 316 **OT enhanced MCC-amygdala functional communication consistently in the social**  
 317 **fear contexts.**  
 318 Examining OT effects on the functional communication of the IMCC revealed a significant  
 319 interaction effect between treatment  $\times$  emotion  $\times$  social located in the right amygdala (rAmy)  
 320 (peak MNI,  $x, y, z = 22, -7, 13$ ,  $t_{(1,65)} = 3.81$ ,  $k = 19$ ,  $p_{\text{FWE-peak}(svc)} = 0.021$ , **Fig. 3a**), with post-hoc  $t$ -  
 321 tests indicating that OT relative to PLC selectively enhanced IMCC-rAmy coupling in social fear  
 322 contexts ( $t_{(1,65)} = 2.70$ ,  $p = 0.009$ , Cohen's  $d = 0.66$ , **Fig. 3b**) but not other contexts (all  $p$ s  $> 0.05$ ,  
 323 FDR-corrected, **Fig. 3b**), confirming social fear-specific effects of OT on the neural level. In  
 324 addition, we found that IMCC-rAmy functional coupling was significantly negatively associated  
 325 with subjective fear experience in the OT ( $r = -0.392$ ,  $p = 0.024$ , **Fig. 3c**) but not PLC group ( $r = -$   
 326  $0.084$ ,  $p = 0.638$ , **Fig. 3c**, Fisher  $r$ -to- $z$  transformation revealed a trend-to-significant difference  
 327 between the treatment groups,  $Z = -1.29$ , one-tailed  $p = 0.099$ ).

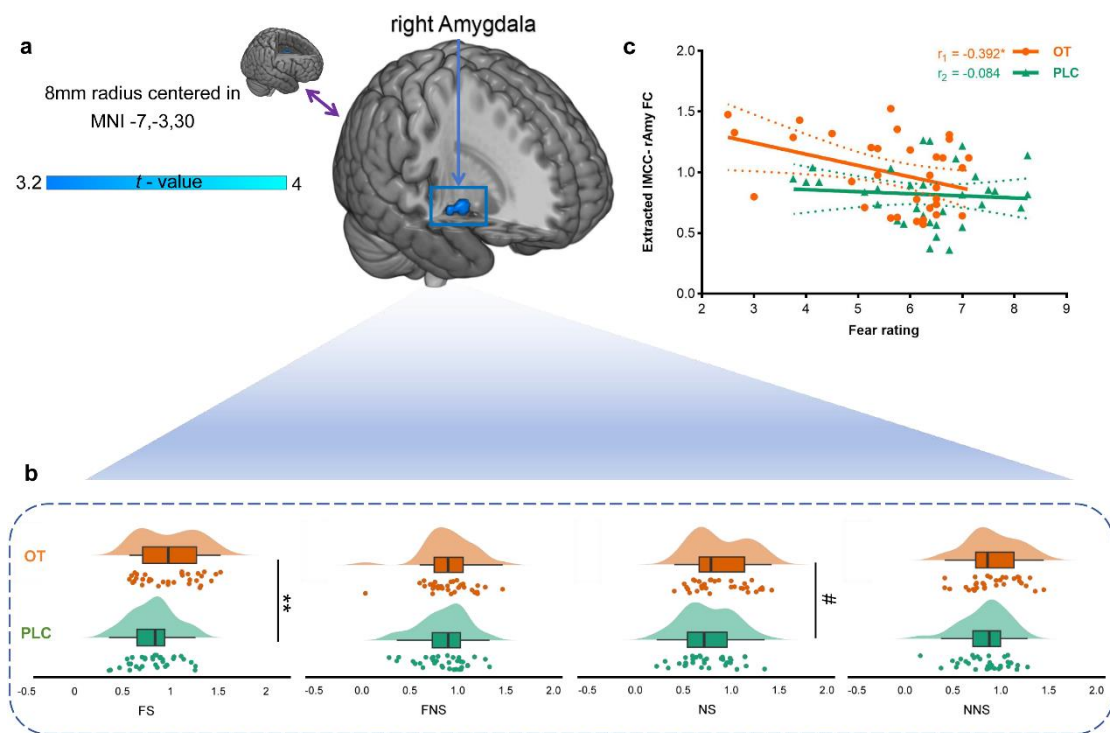

**Fig. 3 OT strengthened IMCC-rAmy communication specifically in social fear contexts.** **a** Interaction effect between treatment  $\times$  emotion  $\times$  social on IMCC connectivity with the right amygdala **b** OT specifically increased functional connectivity between IMCC and rAmy in the FS contexts but not other conditions and **c** The functional connectivity between IMCC and rAmy was significantly negatively correlated with subjective fear experience in OT group but not PLC group. OT oxytocin, PLC placebo, FS fear social, FNS fear non-social, NS neutral social, NNS neutral non-social. \*\*  $p_{\text{FDR-corrected}} < 0.01$ , \*  $p_{\text{FDR-corrected}} < 0.05$ , #  $p_{\text{uncorrected}} < 0.05$ .

328

329

330 **OT enhanced FPN-DAN and DMN-DAN coupling during social fear contexts.**

331 Examining the effects of OT on the large-scale network level using separate two-sample t-tests on  
 332 the matrices of z-values for the two main contrasts of interest (FS – NS, FNS – NNS) and  
 333 following mantel test revealed that OT significantly affected network functional connectivity  
 334 differently under two contexts ( $\rho_{\text{mantel test}} = -0.1333, p > 0.05$ ). Specifically, compared to PLC (all  
 335  $p_s > 0.05$ , **Fig. 4f**), OT significantly enhanced the functional communication between FPN and  
 336 DAN ( $t_{(1,65)} = 2.75, p = 0.0077$ , Cohen's  $d = 0.672$ , **Fig. 4e**) as well as between DMN and DAN  
 337 ( $t_{(1,65)} = 2.02, p = 0.048$ , Cohen's  $d = 0.493$ , **Fig. 4e**) under the social fear but not the non-social  
 338 fear contexts.

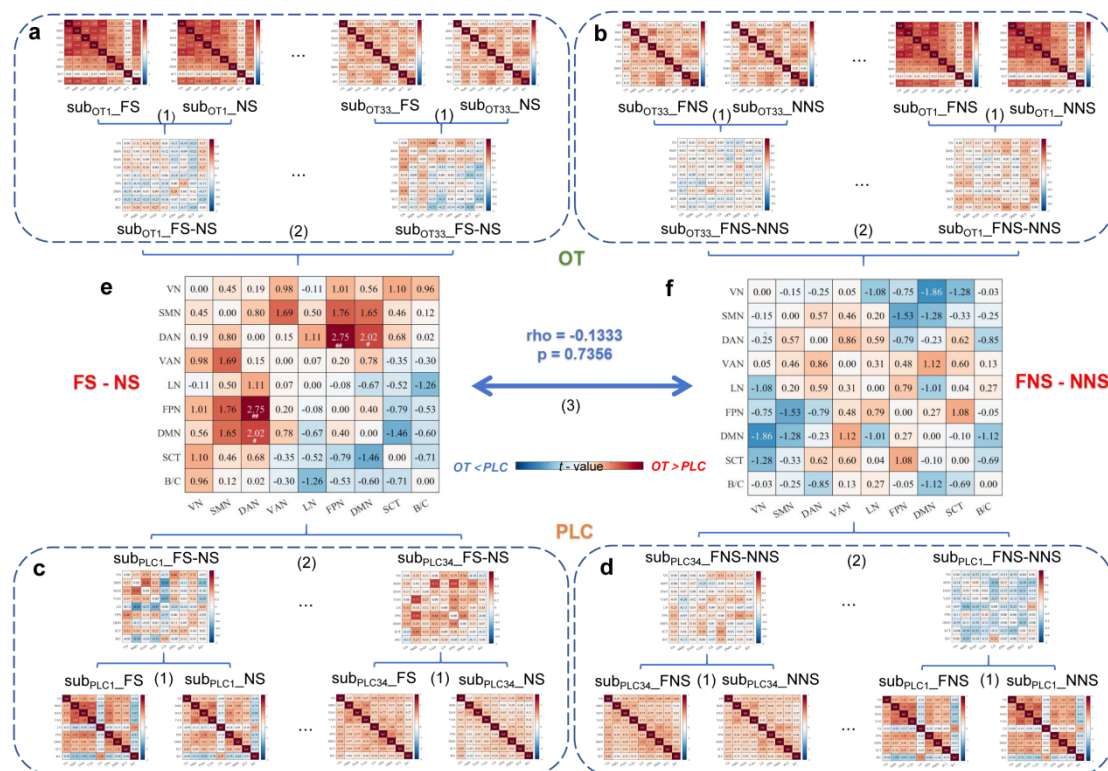

**Fig. 4 OT enhanced functional connectivity on the level of large-scale networks.** **a b c d** Flow of z-value matrix calculation for the degree of response functional connectivity under specific contrasts. (1) The Fisher r-z matrices of each condition for each participant were subtracted to yield a new matrix of z-value corresponding to the contrast (e.g.  $z_{FS} - z_{NS} = z_{FS} - z_{NS}$ ). (2) New matrices of z-value corresponding to a specific contrast were generated for each participant in each group, which were used as features in a two-sample t-test to derive the between-group differences under the specified contrast. **e** OT significantly strengthened the functional connectivity between FPN and DAN as well as DMN and DAN in the fear social-related contrast **f** but not in the fear non-social-related contrast. OT oxytocin, PLC placebo, FS fear social, FNS fear non-social, NS neutral social, NNS neutral non-social, VN visual network, SMN somatomotor network, DAN dorsal attention network, VAN ventral attention network, LN limbic network, FPN frontoparietal network, DMN default mode network, SCT subcortical network, B/C brainstem and cerebellum. ## $p_{\text{un-corrected}} < 0.01$ , # $p_{\text{un-corrected}} < 0.05$ .

339 **OT modulated whole-brain functional connectivity in the social fear context.**

340 We further conducted exploratory analyses to examine whether OT changes brain-wide  
 341 communications. Results showed that while under PLC only few positive connections increased  
 342 activity during the FS versus NS contrast (**Fig. 5a**), OT induced a more widespread connectivity

343 between several brain regions (**Fig. 5b**). Under the FNS versus NNS contrast, the PLC group  
 344 exhibited wide-spread connectivity (**Fig. 5c**), with no obvious changes following OT (**Fig. 5d**).  
 345 Further Mantel tests and Welch's t-test were conducted on the t-value matrices (FS – NS and  
 346 FNS – NNS) between both groups showed significant modulating effects of OT under both  
 347 contrasts ( $\rho_{\text{mantel test}} = 0.0335$ ,  $t_{(1,65)} = 9.05$ ,  $p < 0.0001$  under FS – NS,  $\rho_{\text{mantel test}} = 0.208$ ,  
 348  $t_{(1,65)} = -2.51$ ,  $p = 0.012$  under FNS – NNS), particularly under the fear social contexts.

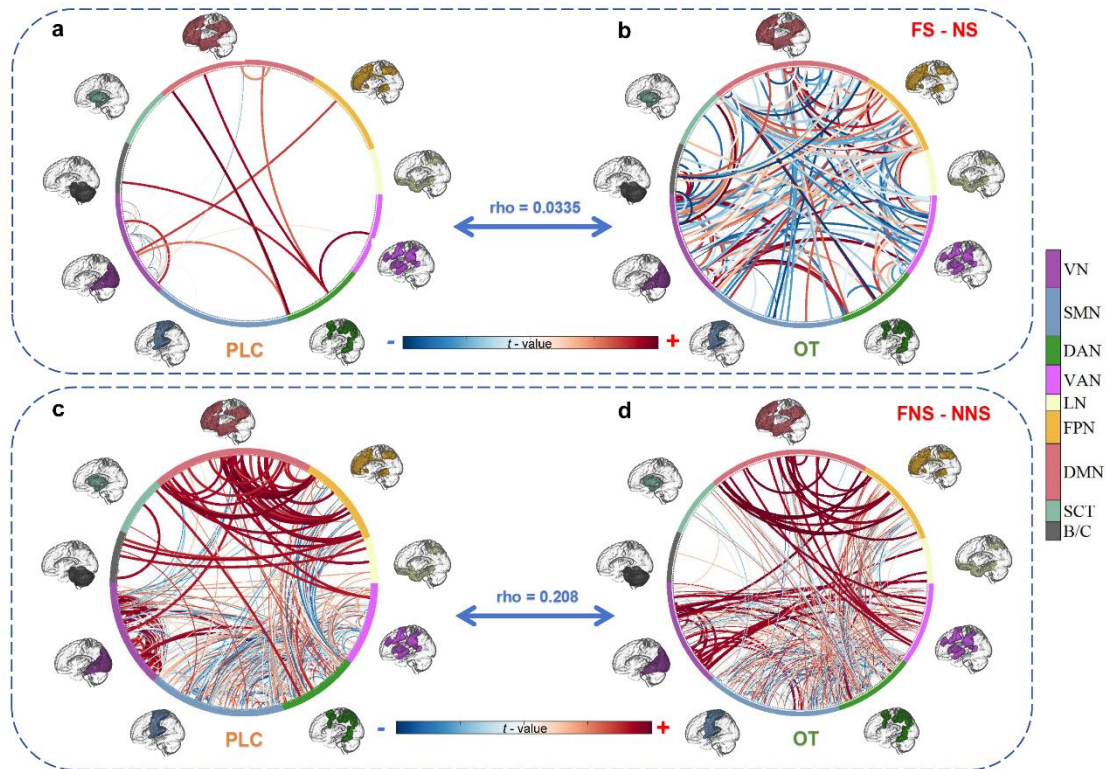

**Fig. 5 Comparison between treatment groups for whole-brain functional connectivity during social and non-social fear separately.** Under fear social contexts, **a** PLC group showed a sparse connectivity between brain regions **b** the OT group exhibited stronger functional interactions at the whole-brain level. In contrast, under the fear non-social context **c** PLC and **d** OT groups showed similar whole-brain functional connectivity patterns. OT oxytocin, PLC placebo, FS fear social, FNS fear non-social, NS neutral social, NNS neutral non-social, VN visual network, SMN somatomotor network, DAN dorsal attention network, VAN ventral attention network, LN limbic network, FPN frontoparietal network, DMN default mode network, SCT subcortical network, B/C brainstem and cerebellum.

349

## 350 Discussion

351 The present study determined the acute behavioral and neural effects of a single intranasal OT  
 352 administration on subjective fear experience in a naturalistic context that resembles dynamic fear  
 353 processing in social and non-social contexts in a close-to-real life setting. On the behavioral level,  
 354 OT decreased the experience of subjective fear across social and non-social contexts, supporting  
 355 a fear-regulating potential of OT under dynamic and ecologically valid conditions. Mirroring the  
 356 stronger effect sizes of the OT-induced fear reduction in social contexts, neural effects of OT were  
 357 primarily observed in social fear contexts, such that OT enhanced regional activation in the left

358 MCC and its communication with the contralateral amygdala specifically during fear in social  
359 contexts with both neural indices exhibiting a negative association with subjective fear following  
360 OT but not PLC. Exploratory network-level analyses further revealed that OT significantly  
361 enhanced the functional connectivity between the DAN and the FPN/DMN, respectively, and  
362 brain-wide communication selectively in social fear contexts. Together, the findings indicate that  
363 a single dose of intranasal OT has the potential to decrease fear in close-to-real life settings by  
364 enhancing IMCC activation and its communication with the amygdala while concomitantly  
365 affecting network-level communication of the DAN with brain networks involved in regulatory  
366 control (FPN<sup>71, 72</sup>) and social processing (DMN<sup>73, 74</sup>) as well as brain-wide functional  
367 communication.

368 Several previous studies in rodents and humans suggested a fear- and anxiety-reducing  
369 potential of OT, however, results remained inconsistent. Studies have described a promising fear-  
370 and anxiety-reducing neurofunctional profile of OT across species, yet the neural effects on  
371 amygdala-related circuits were often observed in the absence of changes in subjective fear  
372 experience or under experimental laboratory settings with limited ecological validity<sup>15, 17-20, 75</sup>.

373 In the context of increasing attempts to enhance the ecological validity of neuroimaging  
374 research using dynamic movie stimuli<sup>27, 28, 76</sup>, we here combined naturalistic fMRI employing  
375 fear-inducing movie clips with a pre-registered randomized double-blind placebo-controlled OT-  
376 administration trial. Across pilot experiments and treatment studies, the procedure induced a  
377 highly immersive and comparably strong experience of fear under close-to-real life conditions.  
378 Importantly, OT decreased subjective fear experience in the more naturalistic context with small  
379 or moderate effect sizes in the non-social or social context, respectively. Although the  
380 pronounced fear-reducing effects of OT in the social context may partly reflect the generally more  
381 moderate fear experience reported by our participants in this context, pronounced effects of OT  
382 in social contexts have been conceptualized in a number of overarching theories and have been  
383 reported in several previous studies<sup>21, 22, 77</sup> including studies reporting decreased subjective  
384 anxiety<sup>78</sup>. The latter hypothesis on the social-specific effects of OT is also mirrored in the brain  
385 functional findings, such that the neurofunctional effects were selectively observed during fear  
386 experiences in social contexts.

387 With respect to regional activation, OT increased the activation of the left middle cingulate  
388 cortex (IMCC). The MCC represents a highly integrative hub that has been involved in both, fear  
389 evaluation<sup>5, 60, 79, 80</sup> as well as the cognitive control of negative affective states including fear<sup>81, 82</sup>.  
390 Concomitantly, OT enhanced functional connectivity from the IMCC to the contralateral amygdala  
391 (rAmy), a pathway that has been previously involved in implementing top-down inhibitory control  
392 over excessive fear-related amygdala engagement<sup>60, 80, 83</sup>. Effects of OT on this circuitry have been  
393 previously reported in the context of reduced subjective anxiety in individuals with PTSD<sup>84</sup> and in

394 response to static fearful faces in patients with generalized social anxiety disorders<sup>25</sup>. Exploring  
395 brain-behavior associations further revealed that OT established a negative association between  
396 higher activity and connectivity in this circuit and subjective fear, underscoring the behavioral  
397 relevance of the OT-induced neurofunctional changes. Together, our findings suggest that OT  
398 exerts its fear-regulating effects under naturalistic contexts via enhancing MCC engagement and  
399 control over the amygdala.

400 On the large-scale network level, OT significantly enhanced the functional connectivity of  
401 the DAN with the FPN as well as the DMN in the social fear contexts. The DAN is centered around  
402 the intraparietal sulcus and the frontal eye fields and plays a pivotal role in top-down or goal-  
403 directed control of attention<sup>85-87</sup>, while the FPN supports goal-directed actions and cognitive  
404 control<sup>71, 88, 89</sup> and the DMN supports self-referential<sup>90, 91</sup> and social processing<sup>73, 74</sup>, with more  
405 recent findings additionally suggesting a role in emotional experience in dynamic naturalistic  
406 contexts<sup>92, 93</sup>. While studies have demonstrated the effects of OT on the interaction between  
407 these large-scale networks during the task-free state<sup>65, 94</sup>, the present findings underscore the  
408 behavioral relevance of these effects of OT in terms of regulating emotional processes in social  
409 contexts. Together with previous studies suggesting an association between dysfunctional  
410 interaction between these large-scale networks and emotional dysregulations in anxiety and  
411 fear-related disorders<sup>32, 91</sup>, the present findings support a potential therapeutic potential of OT  
412 for these disorders<sup>32, 95, 96</sup>.

413 Network-level analyses that explored the effects of OT on the fine-grained level of brain-  
414 wide connectivity patterns suggested that OT may broadly facilitate brain-wide exchange of  
415 information within and across networks particularly between the FPN and DMN in social fear  
416 contexts. The results align with recent findings suggesting that emotional processes such as fear  
417 and anxiety are processed in distributed networks and their interactions<sup>27, 34, 97</sup> as well as the  
418 distributed network-level properties and effects of the OT signaling system<sup>41, 98, 99</sup>. These findings  
419 underscore that OT may exert its effects on human emotion processing under complex  
420 naturalistic conditions via regulating extensive network-level interactions. Together with  
421 increasing the reconceptualization and increasing evidence indicating that mental disorders are  
422 not related to dysfunctions of a single brain region or pathway but rather dysregulated brain-wide  
423 communication<sup>32, 91, 100</sup>, these findings may further underscore the therapeutic potential of the  
424 OT signaling system.

425 Findings have to be considered in the context of limitations of the present design, including  
426 (1) to avoid variations in the effects of OT related to sex<sup>48, 49</sup>, we only focused on male  
427 participants and future studies need to test generalization to females, (2) the study employed a  
428 proof-of-concept design in healthy subjects and future studies need to validate the effects of OT  
429 in populations with pathological fear and anxiety, (3) despite extensive pre-study testing the



430 videos of the social and non-social category differed in terms of the level of fear induced which  
431 partly limits conclusions regarding social-specific effects of OT, (4) the videos included  
432 homogenous brief episodes of fear and future studies need to examine effects of OT on fear  
433 during longer time scales and longer episodes with dynamic fear <sup>27,28</sup>.

434 Taken together, this study demonstrated that OT can reduce subjective fear experience  
435 under naturalistic conditions via enhancing IMCC engagement and its regulatory control over the  
436 amygdala as well as enhancing communication between large-scale networks and brain-wide  
437 communication. These findings consistently indicate a high translational therapeutic potential of  
438 OT to regulate fear in dynamic and close-to-real life environments. Effects were pronounced or  
439 restricted to the social contexts, supporting the role that OT may play in social contexts, and  
440 rendering OT as a promising treatment for social context-specific fear experiences, e.g. in social  
441 anxiety disorders. Findings indicate that OT may be used as a novel therapeutic strategy to  
442 regulate excessive subjective fear symptoms in mental disorders <sup>7,17,24</sup> or may help to prevent the  
443 development of these disorders during early stages or promote long-term recovery <sup>94</sup> via  
444 improving the quality of life, and reduce the social and economic burden related to fear-related  
445 disorders.

446

#### 447 **Acknowledgement**

448 This work was supported by the China MOST2030 Brain Project (Grant No. 2022ZD0208500), the  
449 National Natural Science Foundation of China (Grants No. 32250610208, 82271583-BB), the  
450 National Key Research and Development Program of China (Grant No. 2018YFA0701400-BB), the  
451 Natural Science Foundation of Sichuan Province (Grant number 2022NSFSC1375-WZ) and a start-  
452 up grant from The University of Hong Kong. Disclaimer: Any opinions, findings, conclusions or  
453 recommendations expressed in this publication do not reflect the views of the Government of  
454 the Hong Kong Special Administrative Region or the Innovation and Technology Commission.

455

#### 456 **Author contributions**

457 KF and BB<sup>1</sup> designed the study. KF, ZZ and DL conducted the experiment and collected the data.  
458 KF, SX, WZ, ZL performed the data analysis with the help of TX, YZ, XZ, CL, JW, LW, JH and BB<sup>2</sup>. KF  
459 and BB<sup>1</sup> wrote the manuscript. SX, FZ, KK, TX, YZ, ZL and WZ critically revised the manuscript  
460 draft.

461 Note: BB<sup>1</sup>, Benjamin Becker; BB<sup>2</sup>, Bharat Biswal.

462

#### 463 **Competing interests**

464 The authors declare no competing interests.

465

- 467 1. Osakada T, Yan R, Jiang Y, Wei D, Tabuchi R, Dai B *et al.* A dedicated hypothalamic oxytocin circuit  
468 controls aversive social learning. *Nature* 2024.
- 469 2. Akinrinade I, Kareklas K, Teles MC, Reis TK, Glikberg M, Petri G *et al.* Evolutionarily conserved  
470 role of oxytocin in social fear contagion in zebrafish. *Science* 2023; **379**(6638): 1232-1237.
- 471 3. Faul L, Stjepanović D, Stivers JM, Stewart GW, Graner JL, Morey RA *et al.* Proximal threats  
472 promote enhanced acquisition and persistence of reactive fear-learning circuits. *Proceedings of the*  
473 *National Academy of Sciences* 2020; **117**(28): 16678-16689.
- 474 4. Becker B, Zhou F. Neural Processing of Fear – From Animal Models to Human Research. 2020.
- 475 5. Zhou F, Zhao W, Qi Z, Geng Y, Yao S, Kendrick KM *et al.* A distributed fMRI-based signature for the  
476 subjective experience of fear. *Nature Communications* 2021; **12**(1): 6643.
- 477 6. Bramson B, Meijer S, van Nuland A, Toni I, Roelofs K. Anxious individuals shift emotion control  
478 from lateral frontal pole to dorsolateral prefrontal cortex. *Nature Communications* 2023; **14**(1): 4880.
- 479 7. Kreuder A-K, Scheele D, Schultz J, Hennig J, Marsh N, Dellert T *et al.* Common and dissociable  
480 effects of oxytocin and lorazepam on the neurocircuitry of fear. *Proceedings of the National Academy*  
481 *of Sciences* 2020; **117**(21): 11781-11787.
- 482 8. Szuhany KL, Simon NM. Anxiety Disorders: A Review. *JAMA* 2022; **328**(24): 2431-2445.
- 483 9. Snee A, Nazareth I, Bondaronek P, Liu Y, Cheng Z, Freemantle N. Pharmacological treatments for  
484 generalised anxiety disorder: a systematic review and network meta-analysis. *The Lancet* 2019;  
485 **393**(10173): 768-777.
- 486 10. Taschereau-Dumouchel V, Cortese A, Chiba T, Knotts JD, Kawato M, Lau H. Towards an  
487 unconscious neural reinforcement intervention for common fears. *Proceedings of the National*  
488 *Academy of Sciences* 2018; **115**(13): 3470-3475.
- 489 11. Zhao Z, Yao S, Li K, Sindermann C, Zhou F, Zhao W *et al.* Real-Time Functional Connectivity-  
490 Informed Neurofeedback of Amygdala-Frontal Pathways Reduces Anxiety. *Psychotherapy and*  
491 *Psychosomatics* 2019; **88**(1): 5-15.
- 492 12. Paul JM, Raül A, Rene H, Tiffany RL, Moriel Z, Joanna D. Limbic Neuropeptidergic Modulators of  
493 Emotion and Their Therapeutic Potential for Anxiety and Post-Traumatic Stress Disorder. *The Journal of*  
494 *Neuroscience* 2021; **41**(5): 901.
- 495 13. Zhang R, Zhao W, Qi Z, Xu T, Zhou F, Becker B. Angiotensin II Regulates the Neural Expression of  
496 Subjective Fear in Humans: A Precision Pharmacology-Neuroimaging Approach. *Biological Psychiatry:*  
497 *Cognitive Neuroscience and Neuroimaging* 2023; **8**(3): 262-270.
- 498 14. Zhou F, Geng Y, Xin F, Li J, Feng P, Liu C *et al.* Human Extinction Learning Is Accelerated by an  
499 Angiotensin Antagonist via Ventromedial Prefrontal Cortex and Its Connections With Basolateral  
500 Amygdala. *Biol Psychiat* 2019; **86**(12): 910-920.
- 501 15. Knobloch HS, Charlet A, Hoffmann Lena C, Eliava M, Khrulev S, Cetin Ali H *et al.* Evoked Axonal  
502 Oxytocin Release in the Central Amygdala Attenuates Fear Response. *Neuron* 2012; **73**(3): 553-566.
- 503 16. Neumann ID, Slattery DA. Oxytocin in General Anxiety and Social Fear: A Translational Approach.  
504 *Biol Psychiat* 2016; **79**(3): 213-221.
- 505 17. Eckstein M, Becker B, Scheele D, Scholz C, Preckel K, Schlaepfer TE *et al.* Oxytocin Facilitates the  
506 Extinction of Conditioned Fear in Humans. *Biol Psychiat* 2015; **78**(3): 194-202.
- 507 18. Kou J, Zhang Y, Zhou F, Gao Z, Yao S, Zhao W *et al.* Anxiolytic Effects of Chronic Intranasal  
508 Oxytocin on Neural Responses to Threat Are Dose-Frequency Dependent. *Psychotherapy and*  
509 *Psychosomatics* 2022; **91**(4): 253-264.
- 510 19. Xin F, Zhou X, Dong D, Zhao Z, Yang X, Wang Q *et al.* Oxytocin Differentially Modulates Amygdala  
511 Responses during Top-Down and Bottom-Up Aversive Anticipation. *Adv Sci* 2020; **7**(16): 2001077.
- 512 20. Liu C, Lan C, Li K, Zhou F, Yao S, Xu L *et al.* Oxytocinergic Modulation of Threat-Specific Amygdala  
513 Sensitization in Humans Is Critically Mediated by Serotonergic Mechanisms. *Biological Psychiatry:*  
514 *Cognitive Neuroscience and Neuroimaging* 2021; **6**(11): 1081-1089.
- 515 21. Shamay-Tsoory SG, Abu-Akel A. The Social Salience Hypothesis of Oxytocin. *Biol Psychiat* 2016;  
516 **79**(3): 194-202.
- 517 22. Yao S, Zhao W, Geng Y, Chen Y, Zhao Z, Ma X *et al.* Oxytocin Facilitates Approach Behavior to  
518 Positive Social Stimuli via Decreasing Anterior Insula Activity. *Int J Neuropsychoph* 2018; **21**(10): 918-  
519 925.
- 520 23. Oliver JR, Alexandra CP, Brian C, Christian G. The translational neural circuitry of anxiety. *Journal*  
521 *of Neurology, Neurosurgery & Psychiatry* 2019; **90**(12): 1353.

522 24. Scheele D, Lieberz J, Goertzen-Patin A, Engels C, Schneider L, Stoffel-Wagner B *et al.* Trauma  
523 Disclosure Moderates the Effects of Oxytocin on Intrusions and Neural Responses to Fear.  
524 *Psychotherapy and Psychosomatics* 2019; **88**(1): 61-63.

525 25. Gorka SM, Fitzgerald DA, Labuschagne I, Hosanagar A, Wood AG, Nathan PJ *et al.* Oxytocin  
526 Modulation of Amygdala Functional Connectivity to Fearful Faces in Generalized Social Anxiety  
527 Disorder. *Neuropsychopharmacology* 2015; **40**(2): 278-286.

528 26. Eckstein M, Scheele D, Patin A, Preckel K, Becker B, Walter A *et al.* Oxytocin Facilitates Pavlovian  
529 Fear Learning in Males. *Neuropsychopharmacology* 2016; **41**(4): 932-939.

530 27. Feng Z, Ran Z, Shuxia Y, Debo D, Pan F, Georg K *et al.* Capturing dynamic fear experiences in  
531 naturalistic contexts: An ecologically valid fMRI signature integrating brain activation and connectivity.  
532 *bioRxiv* 2024: 2023.2008.2018.553808.

533 28. Chang LJ, Jolly E, Cheong JH, Rapuano KM, Greenstein N, Chen P-HA *et al.* Endogenous variation  
534 in ventromedial prefrontal cortex state dynamics during naturalistic viewing reflects affective  
535 experience. *Science Advances*; **7**(17): eabf7129.

536 29. Meer JNvd, Breakspear M, Chang LJ, Sonkusare S, Cocchi L. Movie viewing elicits rich and reliable  
537 brain state dynamics. *Nature Communications* 2020; **11**(1): 5004.

538 30. Adolphs R. How should neuroscience study emotions? by distinguishing emotion states,  
539 concepts, and experiences. *Soc Cogn Affect Neur* 2017; **12**(1): 24-31.

540 31. Pessoa L. A Network Model of the Emotional Brain. *Trends in Cognitive Sciences* 2017; **21**(5): 357-  
541 371.

542 32. Wen Z, Seo J, Pace-Schott EF, Milad MR. Abnormal dynamic functional connectivity during fear  
543 extinction learning in PTSD and anxiety disorders. *Molecular Psychiatry* 2022; **27**(4): 2216-2224.

544 33. Eickhoff SB, Milham M, Vanderwal T. Towards clinical applications of movie fMRI. *NeuroImage*  
545 2020; **217**: 116860.

546 34. Saarimäki H, Glerean E, Smirnov D, Mynttinen H, Jääskeläinen IP, Sams M *et al.* Classification of  
547 emotion categories based on functional connectivity patterns of the human brain. *NeuroImage* 2022;  
548 **247**: 118800.

549 35. de Vries IEJ, Wurm MF. Predictive neural representations of naturalistic dynamic input. *Nature*  
550 *Communications* 2023; **14**(1): 3858.

551 36. Redcay E, Moraczewski D. Social cognition in context: A naturalistic imaging approach.  
552 *NeuroImage* 2020; **216**: 116392.

553 37. Lee J-J, Kim HJ, Čeko M, Park B-y, Lee SA, Park H *et al.* A neuroimaging biomarker for sustained  
554 experimental and clinical pain. *Nature Medicine* 2021; **27**(1): 174-182.

555 38. Hayoung S, Bo-yong P, Hyunjin P, Won Mok S. Cognitive and Neural State Dynamics of Narrative  
556 Comprehension. *The Journal of Neuroscience* 2021; **41**(43): 8972.

557 39. Etkin A, Maron-Katz A, Wu W, Fonzo GA, Huemer J, Vértes PE *et al.* Using fMRI connectivity to  
558 define a treatment-resistant form of post-traumatic stress disorder. *Science Translational Medicine*  
559 2019; **11**(486): eaal3236.

560 40. Xu X, Dai J, Chen Y, Liu C, Xin F, Zhou X *et al.* Intrinsic connectivity of the prefrontal cortex and  
561 striato-limbic system respectively differentiate major depressive from generalized anxiety disorder.  
562 *Neuropsychopharmacology* 2021; **46**(4): 791-798.

563 41. Jiang X, Ma X, Geng Y, Zhao Z, Zhou F, Zhao W *et al.* Intrinsic, dynamic and effective connectivity  
564 among large-scale brain networks modulated by oxytocin. *NeuroImage* 2021; **227**: 117668.

565 42. Zhao Z, Ma X, Geng Y, Zhao W, Zhou F, Wang J *et al.* Oxytocin differentially modulates specific  
566 dorsal and ventral striatal functional connections with frontal and cerebellar regions. *NeuroImage*  
567 2019; **184**: 781-789.

568 43. Liu N, Hadj-Bouziane F, Jones KB, Turchi JN, Averbek BB, Ungerleider LG. Oxytocin modulates  
569 fMRI responses to facial expression in macaques. *Proceedings of the National Academy of Sciences*  
570 2015; **112**(24): E3123-E3130.

571 44. Wahis J, Baudon A, Althammer F, Kerspern D, Goyon S, Hagiwara D *et al.* Astrocytes mediate the  
572 effect of oxytocin in the central amygdala on neuronal activity and affective states in rodents. *Nat*  
573 *Neurosci* 2021; **24**(4): 529-541.

574 45. Bethlehem RAI, van Honk J, Auyeung B, Baron-Cohen S. Oxytocin, brain physiology, and  
575 functional connectivity: A review of intranasal oxytocin fMRI studies. *Psychoneuroendocrinology* 2013;  
576 **38**(7): 962-974.

577 46. Faul F, Erdfelder E, Buchner A, Lang A-G. Statistical power analyses using G\*Power 3.1: Tests for  
578 correlation and regression analyses. *Behavior Research Methods* 2009; **41**(4): 1149-1160.

579 47. Liu Y, Li S, Lin W, Li W, Yan X, Wang X *et al.* Oxytocin modulates social value representations in the  
580 amygdala. *Nat Neurosci* 2019; **22**(4): 633-641.

581 48. Gao S, Becker B, Luo L, Geng Y, Zhao W, Yin Y *et al.* Oxytocin, the peptide that bonds the sexes  
582 also divides them. *Proceedings of the National Academy of Sciences* 2016; **113**(27): 7650-7654.

583 49. Ma X, Zhao W, Luo R, Zhou F, Geng Y, Xu L *et al.* Sex- and context-dependent effects of oxytocin  
584 on social sharing. *NeuroImage* 2018; **183**: 62-72.

585 50. Watanabe T, Abe O, Kuwabara H, Yahata N, Takano Y, Iwashiro N *et al.* Mitigation of  
586 Sociocommunicational Deficits of Autism Through Oxytocin-Induced Recovery of Medial Prefrontal  
587 Activity A Randomized Trial. *Jama Psychiat* 2014; **71**(2): 166-175.

588 51. Spengler FB, Schultz J, Scheele D, Essel M, Maier W, Heinrichs M *et al.* Kinetics and Dose  
589 Dependency of Intranasal Oxytocin Effects on Amygdala Reactivity. *Biol Psychiat* 2017; **82**(12): 885-  
590 894.

591 52. Lan CM, Liu CC, Li KS, Zhao ZY, Yang JX, Ma YN *et al.* Oxytocinergic Modulation of Stress-  
592 Associated Amygdala-Hippocampus Pathways in Humans Is Mediated by Serotonergic Mechanisms. *Int*  
593 *J Neuropsychoph* 2022; **25**(10): 807-817.

594 53. Bartz JA, Zaki J, Bolger N, Ochsner KN. Social effects of oxytocin in humans: context and person  
595 matter. *Trends in Cognitive Sciences* 2011; **15**(7): 301-309.

596 54. Andari E, Duhamel J-R, Zalla T, Herbrecht E, Leboyer M, Sirigu A. Promoting social behavior with  
597 oxytocin in high-functioning autism spectrum disorders. *Proceedings of the National Academy of*  
598 *Sciences* 2010; **107**(9): 4389-4394.

599 55. Benjamini Y, Hochberg Y. Controlling the False Discovery Rate: A Practical and Powerful Approach  
600 to Multiple Testing. *Journal of the Royal Statistical Society: Series B (Methodological)* 1995; **57**(1): 289-  
601 300.

602 56. Esteban O, Markiewicz CJ, Blair RW, Moodie CA, Isik AI, Erramuzpe A *et al.* fMRIprep: a robust  
603 preprocessing pipeline for functional MRI. *Nature Methods* 2019; **16**(1): 111-116.

604 57. Power JD, Barnes KA, Snyder AZ, Schlaggar BL, Petersen SE. Spurious but systematic correlations  
605 in functional connectivity MRI networks arise from subject motion. *NeuroImage* 2012; **59**(3): 2142-  
606 2154.

607 58. Motzkin JC, Philippi CL, Wolf RC, Baskaya MK, Koenigs M. Ventromedial Prefrontal Cortex Is  
608 Critical for the Regulation of Amygdala Activity in Humans. *Biol Psychiat* 2015; **77**(3): 276-284.

609 59. Mihov Y, Kendrick KM, Becker B, Zschernack J, Reich H, Maier W *et al.* Mirroring Fear in the  
610 Absence of a Functional Amygdala. *Biol Psychiat* 2013; **73**(7): e9-e11.

611 60. Qi S, Hassabis D, Sun J, Guo F, Daw N, Mobbs D. How cognitive and reactive fear circuits optimize  
612 escape decisions in humans. *Proceedings of the National Academy of Sciences* 2018; **115**(12): 3186-  
613 3191.

614 61. Yekutieli D, Benjamini Y. Resampling-based false discovery rate controlling multiple test  
615 procedures for correlated test statistics. *Journal of Statistical Planning and Inference* 1999; **82**(1): 171-  
616 196.

617 62. McLaren DG, Ries ML, Xu G, Johnson SC. A generalized form of context-dependent  
618 psychophysiological interactions (gPPI): A comparison to standard approaches. *NeuroImage* 2012;  
619 **61**(4): 1277-1286.

620 63. Fung BJ, Qi S, Hassabis D, Daw N, Mobbs D. Slow escape decisions are swayed by trait anxiety.  
621 *Nature Human Behaviour* 2019; **3**(7): 702-708.

622 64. Xu T, Zhou X, Kanen JW, Wang L, Li J, Chen Z *et al.* Angiotensin blockade enhances motivational  
623 reward learning via enhancing striatal prediction error signaling and frontostriatal communication.  
624 *Molecular Psychiatry* 2023; **28**(4): 1692-1702.

625 65. Xin F, Zhou F, Zhou X, Ma X, Geng Y, Zhao W *et al.* Oxytocin Modulates the Intrinsic Dynamics  
626 Between Attention-Related Large-Scale Networks. *Cerebral Cortex* 2021; **31**(3): 1848-1860.

627 66. Brodmann K, Gruber O, Goya-Maldonado R. Intranasal Oxytocin Selectively Modulates Large-  
628 Scale Brain Networks in Humans. *Brain Connectivity* 2017; **7**(7): 454-463.

629 67. Ruslan M, Irina K, Alexander K, Denis C, Maxim K. Comparison of whole-brain task-modulated  
630 functional connectivity methods for fMRI task connectomics. *bioRxiv* 2024: 2024.2001.2022.576622.

631 68. Schmäzle R, Brook O'Donnell M, Garcia JO, Cascio CN, Bayer J, Bassett DS *et al.* Brain  
632 connectivity dynamics during social interaction reflect social network structure. *Proceedings of the*  
633 *National Academy of Sciences* 2017; **114**(20): 5153-5158.

634 69. Foster Brett L, Rangarajan V, Shirer William R, Parvizi J. Intrinsic and Task-Dependent Coupling of  
635 Neuronal Population Activity in Human Parietal Cortex. *Neuron* 2015; **86**(2): 578-590.

636 70. Giordano BL, Whiting C, Kriegeskorte N, Kotz SA, Gross J, Belin P. The representational dynamics  
637 of perceived voice emotions evolve from categories to dimensions. *Nature Human Behaviour* 2021;  
638 **5**(9): 1203-1213.

639 71. Cole MW, Reynolds JR, Power JD, Repovs G, Anticevic A, Braver TS. Multi-task connectivity reveals  
640 flexible hubs for adaptive task control. *Nat Neurosci* 2013; **16**(9): 1348-1355.

641 72. Uddin LQ. Cognitive and behavioural flexibility: neural mechanisms and clinical considerations.  
642 *Nature Reviews Neuroscience* 2021; **22**(3): 167-179.

643 73. Simony E, Honey CJ, Chen J, Lositsky O, Yeshurun Y, Wiesel A *et al.* Dynamic reconfiguration of the  
644 default mode network during narrative comprehension. *Nature Communications* 2016; **7**(1): 12141.

645 74. Axelrod V, Rees G, Bar M. The default network and the combination of cognitive processes that  
646 mediate self-generated thought. *Nature Human Behaviour* 2017; **1**(12): 896-910.

647 75. Peter K, Christine E, Qiang C, Daniela M, Stefanie L, Sarina S *et al.* Oxytocin Modulates Neural  
648 Circuitry for Social Cognition and Fear in Humans. *The Journal of Neuroscience* 2005; **25**(49): 11489.

649 76. Sonkusare S, Breakspear M, Guo C. Naturalistic Stimuli in Neuroscience: Critically Acclaimed.  
650 *Trends in Cognitive Sciences* 2019; **23**(8): 699-714.

651 77. Menon R, Neumann ID. Detection, processing and reinforcement of social cues: regulation by the  
652 oxytocin system. *Nature Reviews Neuroscience* 2023; **24**(12): 761-777.

653 78. Xu X, Li J, Chen Z, Kendrick KM, Becker B. Oxytocin reduces top-down control of attention by  
654 increasing bottom-up attention allocation to social but not non-social stimuli – A randomized  
655 controlled trial. *Psychoneuroendocrinology* 2019; **108**: 62-69.

656 79. Mobbs D, Trimmer PC, Blumstein DT, Dayan P. Foraging for foundations in decision neuroscience:  
657 insights from ethology. *Nature Reviews Neuroscience* 2018; **19**(7): 419-427.

658 80. Tashjian SM, Zbozinek TD, Mobbs D. A Decision Architecture for Safety Computations. *Trends in*  
659 *Cognitive Sciences* 2021; **25**(5): 342-354.

660 81. van Heukelum S, Mars RB, Guthrie M, Buitelaar JK, Beckmann CF, Tiesinga PHE *et al.* Where is  
661 Cingulate Cortex? A Cross-Species View. *Trends in Neurosciences* 2020; **43**(5): 285-299.

662 82. Loh KK, Procyk E, Neveu R, Lambertson F, Hopkins WD, Petrides M *et al.* Cognitive control of  
663 orofacial motor and vocal responses in the ventrolateral and dorsomedial human frontal cortex.  
664 *Proceedings of the National Academy of Sciences* 2020; **117**(9): 4994-5005.

665 83. Shackman AJ, Salomons TV, Slagter HA, Fox AS, Winter JJ, Davidson RJ. The integration of  
666 negative affect, pain and cognitive control in the cingulate cortex. *Nature Reviews Neuroscience* 2011;  
667 **12**(3): 154-167.

668 84. Koch SBJ, van Zuiden M, Nawijn L, Frijling JL, Veltman DJ, Olf M. Intranasal Oxytocin Normalizes  
669 Amygdala Functional Connectivity in Posttraumatic Stress Disorder. *Neuropsychopharmacology* 2016;  
670 **41**(8): 2041-2051.

671 85. Patel GH, Yang D, Jamerson EC, Snyder LH, Corbetta M, Ferrera VP. Functional evolution of new  
672 and expanded attention networks in humans. *Proceedings of the National Academy of Sciences* 2015;  
673 **112**(30): 9454-9459.

674 86. Womelsdorf T, Everling S. Long-Range Attention Networks: Circuit Motifs Underlying  
675 Endogenously Controlled Stimulus Selection. *Trends in Neurosciences* 2015; **38**(11): 682-700.

676 87. Rosenberg MD, Finn ES, Scheinost D, Constable RT, Chun MM. Characterizing Attention with  
677 Predictive Network Models. *Trends in Cognitive Sciences* 2017; **21**(4): 290-302.

678 88. Dixon ML, De La Vega A, Mills C, Andrews-Hanna J, Spreng RN, Cole MW *et al.* Heterogeneity  
679 within the frontoparietal control network and its relationship to the default and dorsal attention  
680 networks. *Proceedings of the National Academy of Sciences* 2018; **115**(7): E1598-E1607.

681 89. Keller AS, Sydnor VJ, Pines A, Fair DA, Bassett DS, Satterthwaite TD. Hierarchical functional system  
682 development supports executive function. *Trends in Cognitive Sciences* 2023; **27**(2): 160-174.

683 90. Satpute AB, Lindquist KA. The Default Mode Network's Role in Discrete Emotion. *Trends*  
684 *in Cognitive Sciences* 2019; **23**(10): 851-864.

685 91. Sylvester CM, Corbetta M, Raichle ME, Rodebaugh TL, Schlaggar BL, Sheline YI *et al.* Functional  
686 network dysfunction in anxiety and anxiety disorders. *Trends in Neurosciences* 2012; **35**(9): 527-535.

687 92. Xu S, Zhang Z, Li L, Zhou Y, Lin D, Zhang M *et al.* Functional connectivity profiles of the default  
688 mode and visual networks reflect temporal accumulative effects of sustained naturalistic emotional  
689 experience. *NeuroImage* 2023; **269**: 119941.

690 93. Brandman T, Malach R, Simony E. The surprising role of the default mode network in naturalistic  
691 perception. *Communications Biology* 2021; **4**(1): 79.

692 94. Davies C, Martins D, Dipasquale O, McCutcheon RA, De Micheli A, Ramella-Cravarro V *et al.*  
693 Connectome dysfunction in patients at clinical high risk for psychosis and modulation by oxytocin.  
694 *Molecular Psychiatry* 2024.  
695 95. Chai Y, Sheline YI, Oathes DJ, Balderston NL, Rao H, Yu M. Functional connectomics in depression:  
696 insights into therapies. *Trends in Cognitive Sciences* 2023; **27**(9): 814-832.  
697 96. Yan C-G, Chen X, Li L, Castellanos FX, Bai T-J, Bo Q-J *et al.* Reduced default mode network  
698 functional connectivity in patients with recurrent major depressive disorder. *Proceedings of the*  
699 *National Academy of Sciences* 2019; **116**(18): 9078-9083.  
700 97. Liu X, Jiao G, Zhou F, Kendrick KM, Yao D, Gong Q *et al.* A neural signature for the subjective  
701 experience of threat anticipation under uncertainty. *Nature Communications* 2024; **15**(1): 1544.  
702 98. Zhang H, Chen K, Bao J, Wu H. Oxytocin enhances the triangular association among behavior,  
703 resting-state, and task-state functional connectivity. *Human Brain Mapping* 2023; **44**(17): 6074-6089.  
704 99. Quintana DS, Rokicki J, van der Meer D, Alnæs D, Kaufmann T, Córdova-Palomera A *et al.*  
705 Oxytocin pathway gene networks in the human brain. *Nature Communications* 2019; **10**(1): 668.  
706 100. Deco G, Kringelbach Morten L. Great Expectations: Using Whole-Brain Computational  
707 Connectomics for Understanding Neuropsychiatric Disorders. *Neuron* 2014; **84**(5): 892-905.  
708  
709
